# Supplementary material
Source: publisher figshare collection journal article supplement (https://frontiersin.figshare.com/ndownloader/files/12566504)
Supplement: Supplementary file [file 12566504]

Appendix A; Synchronized Metronome Training (SMT) paradigm

| Session 1                                                    | Session 2                                | Session 3                                           | Session 4                                    | Session 5                                         | Session 6                            | Session 7                                         | Session 8                          | Session 9                                           | Session 10                                          | Session 11                          | Session 12                                                    |                               |                                   |                                                |                               |                               |                               |
|--------------------------------------------------------------|------------------------------------------|-----------------------------------------------------|----------------------------------------------|---------------------------------------------------|--------------------------------------|---------------------------------------------------|------------------------------------|-----------------------------------------------------|-----------------------------------------------------|-------------------------------------|---------------------------------------------------------------|-------------------------------|-----------------------------------|------------------------------------------------|-------------------------------|-------------------------------|-------------------------------|
| 44 min                                                       | 41 min                                   | 41 min                                              | 43 min                                       | 41 min                                            | 43 min                               | 41 min                                            | 41 min                             | 42 min                                              | 43 min                                              | 42 min                              | 44 min                                                        |                               |                                   |                                                |                               |                               |                               |
| Pre-test;<br>Exercise 1-13, and soccer-<br>exercise I and II | Exercise 1<br>3 min / 54 bpm<br>(GS) OFF | Exercise 1<br>4 min / 54 bpm                        | Exercise 1<br>9 min / 54 bpm                 | Freestyle I<br>2 min / 78 bpm                     | Exercise 1<br>2 min / 54 bpm         | Exercise 10<br>2 min / 54 bpm                     | Exercise 5<br>2 min / 54 bpm       | Exercise 5<br>2 minutes                             | Exercise 8<br>2 min / 54 bpm                        | Exercise 12<br>2 minutes            | Exercise 1<br>2 min / 54 bpm                                  |                               |                                   |                                                |                               |                               |                               |
|                                                              | Exercise 1<br>6 min / 54 bpm<br>(GS) ON  | Exercise 4<br>3 min / 54 bpm                        |                                              | Quick Feet<br>4 min / 90 bpm                      | Exercise 2<br>2 min / 54 bpm         | Exercise 3<br>2 min / 54 bpm                      | Exercise 11<br>2 min / 54 bpm      | Exercise 2<br>2 min / 54 bpm                        | Exercise 6<br>2 minutes                             | Exercise 9<br>2 min / 54 bpm        | Exercise 13<br>2 minutes                                      | Exercise 2<br>2 min / 54 bpm  |                                   |                                                |                               |                               |                               |
|                                                              | Exercise 2<br>3 min / 54 bpm             | Quick Feet<br>4 min / 80 bpm                        |                                              | Quick Feet<br>4 min / 80 bpm                      | Tic-Tac<br>3 min / 90 bpm            | Exercise 7<br>2 min / 54 bpm                      | Quick Feet<br>4 min / 90 bpm       | Exercise 3<br>2 min / 54 bpm                        | Exercise 3<br>2 min / 54 bpm                        | Quick Feet<br>4 min / 90 bpm        | Exercise 1<br>30 min / 54 bpm                                 | Exercise 1<br>38 min / 54 bpm | Exercise 3<br>2 min / 54 bpm      |                                                |                               |                               |                               |
|                                                              | Exercise 6<br>3 min / 54 bpm             | Exercise 2<br>3 min / 54 bpm                        | Exercise 2<br>3 min / 54 bpm                 |                                                   | Exercise 5<br>2 min / 54 bpm         | Multi D Wheel<br>3min / 78 bpm<br>clockwise       | Exercise 4<br>2 min / 54 bpm       | Exercise 4<br>2 min / 54 bpm                        | Double MD Wheel<br>3min / 54 bpm<br>clockwise       | Exercise 4<br>2 min / 54 bpm        |                                                               |                               |                                   |                                                |                               |                               |                               |
| Exercise 1<br>5 min / 54 bpm                                 | Exercise 10<br>4 min / 54 bpm            | Exercise 3<br>3 min / 54 bpm                        | Exercise 2<br>3 min / 54 bpm                 | Exercise 9<br>2 min / 54 bpm                      | Multi D Wheel<br>3min / 54 bpm (cw)  | Multi D Wheel<br>3 min / 78 bpm<br>anti clockwise | Exercise 5<br>2 min / 54 bpm       | Exercise 5<br>2 min / 54 bpm                        | Double MD Wheel<br>3 min / 54 bpm<br>anti clockwise | Shuffle step II<br>3 min / 54 bpm   |                                                               |                               | Freestyle II<br>2 min / 54 bpm    | Exercise 5<br>2 min / 54 bpm                   |                               |                               |                               |
|                                                              |                                          | Freestyle I<br>2 min / 66 bpm                       | Exercise 3<br>3 min / 54 bpm                 | Exercise 3<br>3 min / 54 bpm                      | Multi D Wheel<br>3min / 54 bpm (acw) | Exercise 12<br>3 min / 54 bpm                     | Shuffle step I<br>3 min / 54 bpm   | Exercise 6<br>2 min / 54 bpm                        | Tic-Tac<br>4 min / 100 bpm                          | Freestyle II<br>2 min / 54 bpm      |                                                               |                               | Freestyle II<br>2 min / 54 bpm    | Double MD Wheel<br>3 min / 78 bpm<br>clockwise |                               |                               |                               |
| Exercise 4<br>4min / 54 bpm Guidesounds<br>off               | Exercise 3<br>3 min / 54 bpm             | Exercise 10<br>3 min / 54 bpm                       | Exercise 10<br>3 min / 54 bpm                | Exercise 1<br>19 min / 54 bpm                     | Exercise 13<br>3 min / 54 bpm        | Exercise 1<br>10 min / 54 bpm                     | On Toes<br>2 min / 100 bpm         | Exercise 1<br>30 min / 54 bpm                       | Exercise 12<br>4 min / 66 bpm                       | Exercise 1<br>38 min / 54 bpm       | Exercise 1<br>38 min / 54 bpm                                 | Exercise 4<br>4 min / 54 bpm  |                                   |                                                |                               |                               |                               |
| Exercise 5<br>2 min / 54 bpm                                 | Exercise 5<br>3 min / 54 bpm             | Exercise 11<br>3 min / 54 bpm                       | Exercise 11<br>3 min / 54 bpm                |                                                   | Exercise 13<br>3 min / 54 bpm        |                                                   |                                    |                                                     | Exercise 13<br>3 min / 54 bpm                       |                                     |                                                               | Exercise 13<br>3 min / 54 bpm | Exercise 13<br>3 min / 54 bpm     | Exercise 12<br>4 min / 66 bpm                  | Exercise 12<br>4 min / 66 bpm | Quick Feet<br>4 min / 90 bpm  |                               |
| Exercise 6<br>2 min / 54 bpm                                 | Exercise 11<br>4 min / 54 bpm            | Shuffle step I<br>3 min / 40 bpm<br>Guidesounds off | Exercise 12<br>3 min / 54 bpm                |                                                   | Exercise 4<br>16 min / 54 bpm        |                                                   |                                    |                                                     | Exercise 4<br>16 min / 54 bpm                       |                                     |                                                               | Tic-Tac<br>3 min / 100 bpm    | Shuffle step II<br>3 min / 40 bpm | Exercise 12<br>4 min / 66 bpm                  | Tic-Tac<br>3 min / 100 bpm    | Exercise 10<br>2 min / 54 bpm | Exercise 10<br>2 min / 54 bpm |
| Exercise 7<br>3 min / 54 bpm                                 |                                          | Exercise 4<br>4 min / 54 bpm                        | Exercise 1<br>4 min / 54 bpm                 |                                                   | Tic-Tac<br>3 min / 90 bpm            |                                                   |                                    |                                                     | On Toes<br>3 min / 90 bpm                           |                                     |                                                               | On Toes<br>3 min / 90 bpm     | On Toes<br>3 min / 90 bpm         | Double MD Wheel<br>3min / 78 bpm<br>clockwise  | Exercise 13<br>4 min / 66 bpm | Exercise 13<br>4 min / 66 bpm | Exercise 7<br>2 min / 54 bpm  |
| Exercise 2<br>4 min / 54 bpm                                 | Freestyle I<br>2 min / 54 bpm            | Exercise 7<br>2 min / 54 bpm                        | Multi D Wheel<br>3 min / 66 bpm<br>clockwise | Twist & Tap Left<br>2 min / 54 bpm                | Twist & Tap Left<br>2 min / 54 bpm   | On Toes<br>3 min / 90 bpm                         | Exercise 10<br>3 min / 54 bpm      | Exercise 2<br>2 min / 54 bpm                        | On Toes<br>3 min / 100 bpm                          | Back & Forth I<br>3 min / 54 bpm    | Post-test;<br>Exercise 1-13, and soccer-<br>exercise I and II |                               |                                   |                                                |                               |                               |                               |
| Exercise 3<br>4 min / 54 bpm                                 |                                          | Exercise 7<br>2 min / 54 bpm                        | On Toes<br>3 min / 80 bpm                    | Multi D Wheel<br>3 min / 66 bpm<br>anti clockwise | Twist & Tap Right<br>2 min / 54 bpm  | Twist & Tap Right<br>2 min / 54 bpm               | Twist & Tap Left<br>2 min / 54 bpm | Double MD Wheel<br>3 min / 78 bpm<br>anti clockwise | Back & Forth I<br>3 min / 54 bpm                    | Back & Forth I<br>3 min / 54 bpm    |                                                               |                               |                                   |                                                |                               |                               |                               |
| Exercise 8<br>3 min / 54 bpm                                 | Exercise 8<br>2 min / 54 bpm             | Twist & Tap Left<br>2 min / 54 bpm                  | Shuffle step I<br>3 min / 46 bpm             | Back & Forth I<br>3 min / 54 bpm                  | Back & Forth I<br>3 min / 54 bpm     | On Toes<br>3 min / 90 bpm                         | Exercise 11<br>3 min / 54 bpm      | Exercise 3<br>2 min / 54 bpm                        | Back & Forth II<br>3 min / 54 bpm                   | Twist & Tap Left<br>2 min / 54 bpm  |                                                               |                               |                                   |                                                |                               |                               |                               |
| Exercise 9<br>3 min / 54 bpm                                 | Exercise 9<br>2 min / 54 bpm             | Twist & Tap Right<br>2 min / 54 bpm                 | Exercise 13<br>3 min / 54 bpm                | Shuffle step I<br>2 min / 46 bpm                  | Shuffle step I<br>2 min / 46 bpm     | Exercise 5<br>2 min / 54 bpm                      | Exercise 6<br>2 min / 54 bpm       | Exercise 2<br>2 min / 54 bpm                        | Twist & Tap Right<br>2 min / 54 bpm                 | Twist & Tap Right<br>2 min / 54 bpm |                                                               |                               |                                   |                                                |                               |                               |                               |

|             |                     |                                                 |                             |                                                                                                                                                                                                                                                                                           |
|-------------|---------------------|-------------------------------------------------|-----------------------------|-------------------------------------------------------------------------------------------------------------------------------------------------------------------------------------------------------------------------------------------------------------------------------------------|
| Exercise 1  | Both hands          | Clapping hands together in a circular fashion   | Soccer exercise I           | 3 floor-mats. One in front and one on each side of participant:   _ _  . L toe on L mat -> R toe on front mat -> R toe on front mat -> R toe on right mat -> L toe on L mat... ∞. 54 bpm                                                                                                  |
| Exercise 2  | Right hand          | Clapping the hand towards the thigh             | Soccer exercise II          | Kicking a contact-sensing trigger placed under a beam 30 cm above the ground, hitting the trigger with the top of the foot. 54 bpm                                                                                                                                                        |
| Exercise 3  | Left hand           | Clapping the hand towards the thigh             | Freestyle I                 | 4 beats clapping hands (as in exercise 1) -> 4 beats both toes (as in exercise 4) -> 4 beats clapping hands -> 4 beats both toes... ∞                                                                                                                                                     |
| Exercise 4  | Both toes           | Tapping front floor-sensor, L/R toe alternately | Freestyle II                | 1 floor-mat in front of participant. 4 beats L toe -> 8 beats both toes -> 4 beats R toe -> 4 beats both toes... ∞                                                                                                                                                                        |
| Exercise 5  | Right toe           | Tapping front floor-sensor with R toe           | Quick Feet                  | 3 floor-mats. One in front and one on each side of participant:   _ _  . L toe L mat -> L toe front mat -> R toe front mat -> R toe right mat -> L toe on L mat... ∞                                                                                                                      |
| Exercise 6  | Left toe            | Tapping front floor-sensor with L toe           | Twist & Tap (L/R)           | 3 floor-mats. One in front and one on each side of participant:   _ _  . Balance on one foot. Tap the three floor mats with the toe of the other foot from L-R or R-L.                                                                                                                    |
| Exercise 7  | Both heels          | Tapping rear floor-sensor, L/R heel alternately | Multidirectional (MD) Wheel | 4 floor-mats around the participants. Starts with R toe hitting the R side of the front mat -> R toe on R mat -> R heel on R side of rear mat -> L heel on L side of rear mat -> L toe on L mat -> L toe on the L side of the front-mat -> R toe hitting the R side of the front mat... ∞ |
| Exercise 8  | Right heel          | Tapping rear floor-sensor with R heel           | Double MD Wheel             | Like the Multidirectional Wheel, but now the subject is tapping the same mat twice before moving on to the next one.                                                                                                                                                                      |
| Exercise 9  | Left heel           | Tapping rear floor-sensor with L heel           | Back & Forth I              | 3 floor-mats in front of participant: -> * _ _ * ->. Starting with weight on L* foot, stepping on R-L-R mat, then L foot on floor (* to initiate 3 steps (R-L-R) backward movemen... ∞                                                                                                    |
| Exercise 10 | R Hand / L Toe      | Alternating R hand on thigh, and L toe on mat   | Back & Forth II             | As Back & Forth I, however starting with the opposite foot.                                                                                                                                                                                                                               |
| Exercise 11 | L Hand / R Toe      | Alternating L hand on thigh, and R toe on mat   | Tic-Tac                     | Like Back and Forth, but with the addition of a wall-mounted hand sensor (+) starting the movement sequence: + * _ _ *                                                                                                                                                                    |
| Exercise 12 | Balance and tap R/L | Balance on R foot and tap L toe on mat          | Shuffle Step                | 3 floor-mats in a circular lay-out, approx. 1 m apart, and a cone in the middle. The participant moves from one mat to the next utilizing shuffle-steps (sideways skipping)                                                                                                               |
| Exercise 13 | Balance and tap L/R | Balance on L foot and tap R toe on mat          | On Toes                     | 1 floor-mat in front of the participant. Utilizing a skipping-movement to alternate tapping with L/R toe.                                                                                                                                                                                 |
